# Supplementary material
Source: PubMed Central journal article supplement (PMC3216433)
Supplement: supp_110178_second-singh-1-at.pdf [file supp_110178_second-singh-1-at.pdf]

**Appendix 1 (as supplied by the authors):** Utility decrements for modelled health states

|                         | <b>Utility decrement<br/>(year 1)</b> | <b>Utility decrement in<br/>subsequent years<br/>( Year <math>\geq</math> 2 )</b> |
|-------------------------|---------------------------------------|-----------------------------------------------------------------------------------|
| Ischaemic Heart Disease | -0.0412                               | -0.0240                                                                           |
| Myocardial infarction   | -0.0409                               | -0.0120                                                                           |
| Heart Failure           | -0.0635                               | -0.0180                                                                           |
| Stroke                  | -0.0524                               | -0.0400                                                                           |
| Amputation*             | -0.28                                 | -0.28                                                                             |
| Blindness               | -0.0498                               | -0.0498                                                                           |
| Renal Failure*          | -0.2630                               | -0.2630                                                                           |

Patients with type 2 diabetes without an event were assumed to have a utility of 0.753.

\* Utility decrements were not available from the US catalogue;<sup>1,2</sup> therefore, they were obtained from a study by Clarke et al<sup>1</sup> which utilized the EQ-5D instrument.

**References**

1. Clarke P, Gray A, Holman R. Estimating utility values for health states of type 2 diabetic patients using the EQ-5D (UKPDS 62). *Med Decis Making.* 2002;22(4):340-9.
2. Sullivan PW, Lawrence WF, Ghushchyan V. A national catalog of preference-based scores for chronic conditions in the United States. *Med Care.* 2005 Jul;43(7):736-49.
